# Supplementary material for: MKX-AS1 Gene Expression Associated with Variation in Drug Response to Oxaliplatin and Clinical Outcomes in Colorectal Cancer Patients
Source: MDPI journal article supplement (doi:10.3390/ph16050757), 2023-05-17
Supplement: s1 [file s1]

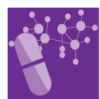

Supplemental Table S1. Predict MKX-AS1 SNP rs11006706. [83-88]

| Genomic Position | rsID       | REF | ALT | Genome Region  | PredictSNP       |                     |                             | CADD             |                     |                             |
|------------------|------------|-----|-----|----------------|------------------|---------------------|-----------------------------|------------------|---------------------|-----------------------------|
|                  |            |     |     |                | Estimated effect | Score given by tool | Estimated expected accuracy | Estimated effect | Score given by tool | Estimated expected accuracy |
| chr10:28050840   | rs11006706 | G   | A   | ncRNA intronic | neutral          | -1                  | 0.88                        | neutral          | 4.663               | 0.8                         |
| chr10:27745700   | rs11006701 | G   | C   | ncRNA intronic | neutral          | 0.2806798           | 0.73                        | deleterious      | 11.62               | 0.69                        |
| chr10:27745700   | .          | G   | A   | ncRNA intronic | deleterious      | 0.42256593          | 0.91                        | deleterious      | 13.06               | 0.79                        |
| chr10:27745700   | .          | G   | T   | ncRNA intronic | deleterious      | 0.37735204          | 0.91                        | deleterious      | 11.89               | 0.69                        |

| DANN             |                     |                             | FATHMM           |                     |                             | FunSeq           |                     |                             | GWAVA            |                     |                             |
|------------------|---------------------|-----------------------------|------------------|---------------------|-----------------------------|------------------|---------------------|-----------------------------|------------------|---------------------|-----------------------------|
| Estimated effect | Score given by tool | Estimated expected accuracy | Estimated effect | Score given by tool | Estimated expected accuracy | Estimated effect | Score given by tool | Estimated expected accuracy | Estimated effect | Score given by tool | Estimated expected accuracy |
| neutral          | 0.6220574           | 0.71                        | neutral          | 0.13318             | 0.89                        | neutral          | 1.65E-20            | 0.8                         | neutral          | 0.16                | 0.79                        |
| deleterious      | 0.8451956           | 0.62                        | neutral          | 0.18712             | 0.77                        | deleterious      | 1.79118225          | 0.64                        | neutral          | 0.29                | 0.7                         |
| deleterious      | 0.9631567           | 1                           | neutral          | 0.18737             | 0.77                        | deleterious      | 1.79117016          | 0.64                        | neutral          | 0.29                | 0.7                         |
| deleterious      | 0.9304451           | 0.96                        | neutral          | 0.20506             | 0.75                        | deleterious      | 1.79078091          | 0.64                        | neutral          | 0.29                | 0.7                         |

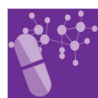**Supplemental Table S2.** Minor Allele Frequency for SNP rs11006706.

| Global      | Study-wide | 5008 | G=0.8235 | A=0.1765 |
|-------------|------------|------|----------|----------|
| African     | Sub        | 1322 | G=0.9486 | A=0.0514 |
| East Asian  | Sub        | 1008 | G=0.6290 | A=0.3710 |
| Europe      | Sub        | 1006 | G=0.8897 | A=0.1103 |
| South Asian | Sub        | 978  | G=0.786  | A=0.214  |
| American    | Sub        | 694  | G=0.824  | A=0.176  |

\* 1000Genomes.BioProject ID: PRJEB6930

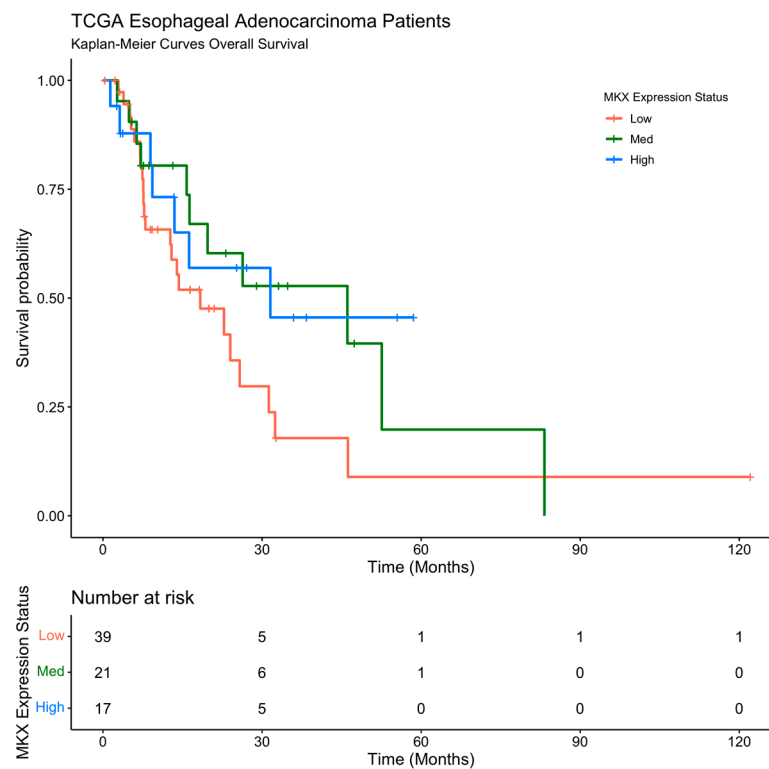

(a)

Univariate Cox Regression Analysis: Hazard Ratio of MKX stauts in Esophageal Adenocarcinoma Patients

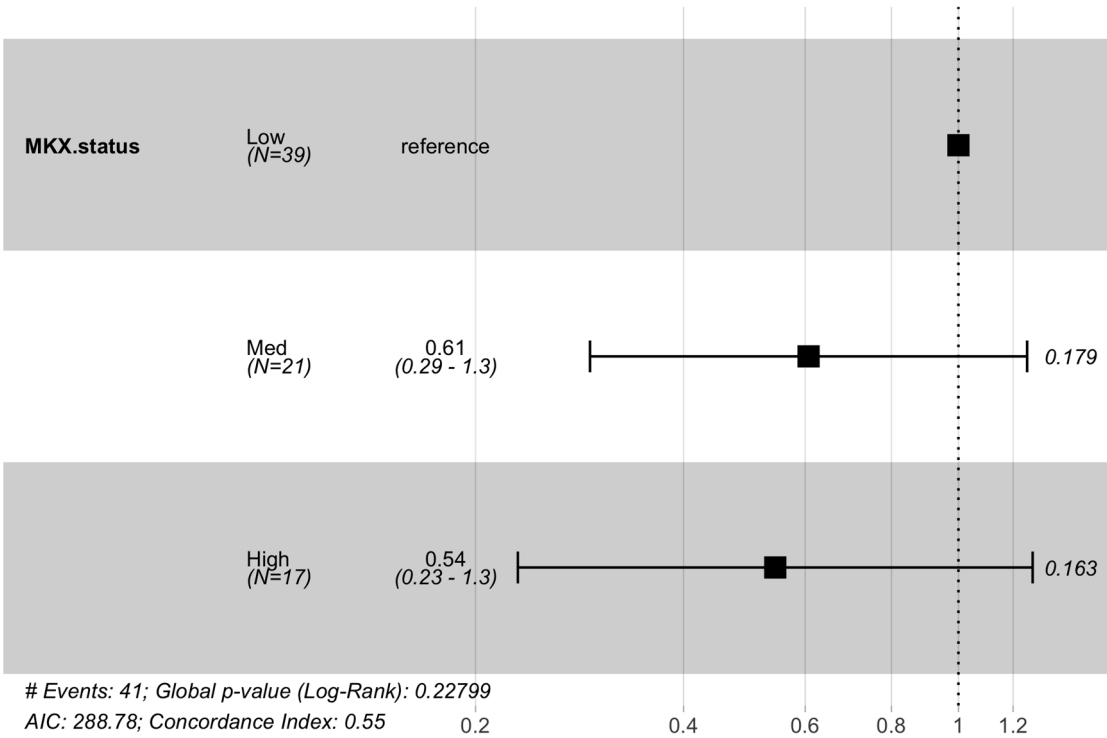

(b)

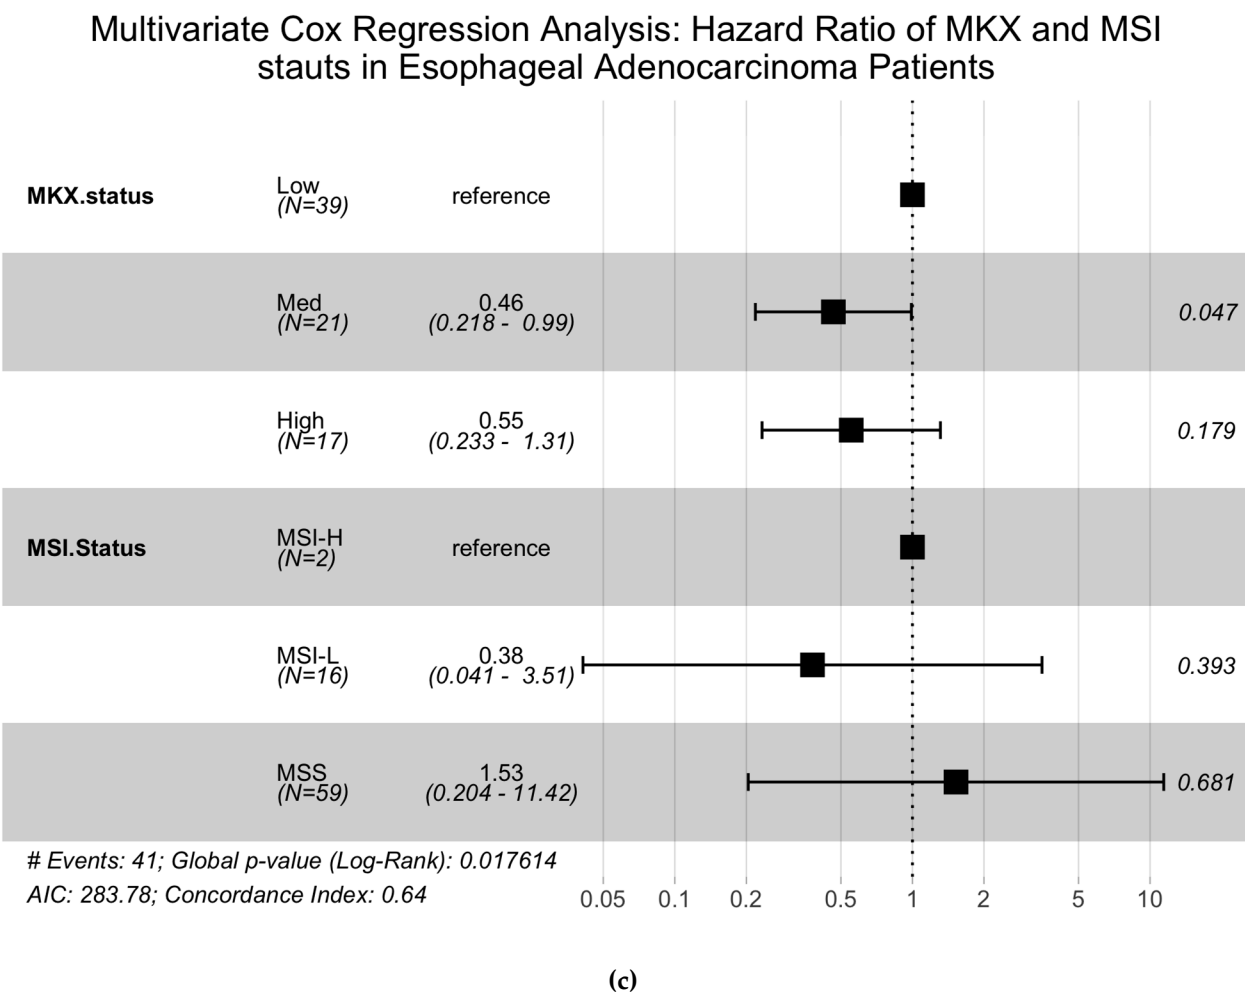

**Figure S1.** (a) Kaplan–Meier curve of OS for the TCGA Esophageal Adenocarcinoma patient cohort based on the MKX gene expression status. Cox Proportional-Hazards Model Hazard Ratio with 95% Confidence Interval and p-value is shown. (b) Forest plot showing univariate Cox regression analysis: hazard ratio of MKX status in TCGA Esophageal Adenocarcinoma patient cohort. (c) Forest plot showing the multivariate Cox regression analysis: hazard ratio of MKX and MSI (Microsatellite Instability) status in TCGA Esophageal Adenocarcinoma patient cohort. MSS- Microsatellite stable; MSI-L, Low levels of MSI; MSI-H, High levels of MSI.

References

83. Rentzsch, P.; Schubach, M.; Shendure, J.; Kircher, M. CADD-Splice-improving genome-wide variant effect prediction using deep learning-derived splice scores. *Genome Med.* **2021**, *13*, 31, doi:10.1186/s13073-021-00835-9.

84. Bendl, J.; Musil, M.; Štourač, J.; Zendulka, J.; Damborský, J.; Brezovský, J. Predictsnp2: A unified platform for accurately evaluating SNP effects by exploiting the different characteristics of variants in distinct genomic regions. *PLoS Comput. Biol.* **2016**, *12*, e1004962, doi:10.1371/journal.pcbi.1004962.

85. Bahcall, O. FunSeq for cancer genomics. *Nat. Genet.* **2013**, *45*, 1273–1273, doi:10.1038/ng.2819.

86. Ritchie, G.R.S.; Dunham, I.; Zeggini, E.; Flicek, P. Functional annotation of noncoding sequence variants. *Nat. Methods* **2014**, *11*, 294–296, doi:10.1038/nmeth.2832.

87. Quang, D.; Chen, Y.; Xie, X. DANN: a deep learning approach for annotating the pathogenicity of genetic variants. *Bioinformatics* **2015**, *31*, 761–763, doi:10.1093/bioinformatics/btu703.

88. Shihab, H.A.; Gough, J.; Mort, M.; Cooper, D.N.; Day, I.N.M.; Gaunt, T.R. Ranking non-synonymous single nucleotide polymorphisms based on disease concepts. *Hum Genomics* **2014**, *8*, 11, doi:10.1186/1479-7364-8-11.

**Disclaimer/Publisher's Note:** The statements, opinions and data contained in all publications are solely those of the individual author(s) and contributor(s) and not of MDPI and/or the editor(s). MDPI and/or the editor(s) disclaim responsibility for any injury to people or property resulting from any ideas, methods, instructions or products referred to in the content.

52

53

54

55

56
